# Supplementary material for: Capsid antigen presentation flags human hepatocytes for destruction after transduction by adeno-associated viral vectors
Source: JCI journal article supplement (doi:10.1172/jci36891), 2009-05-13
Supplement: sd1 [file 1]

**SUPPLEMENTAL MATERIAL**

Gary C. Pien, et al.

**Capsid antigen presentation flags hepatocytes for destruction after transduction by  
adeno-associated viral vectors**

## **Supplemental Methods**

*Non-denaturing PAGE analysis of TCR-multimers.* To analyze the multimerization of biotinylated soluble TCR monomers with streptavidin-conjugated APC, NativePAGE (Invitrogen) was conducted according to manufacturer's instructions. Briefly, NativeMARK unstained protein standards (Invitrogen), non-denatured streptavidin-APC, monomeric TCR, or conjugated TCR-multimers were loaded onto a Novex 3-12% Bis-Tris pre-cast gel (Invitrogen) and resolved for 100 minutes at 150 V. The gel was then removed and fixed for 20 minutes in a solution of 40% methanol with 10% acetic acid. Protein bands were visualized by incubation with 0.02% Coomassie R-250 (Bio-Rad) in 30% methanol and 10% acetic acid for 20 minutes. The gel was then destained with 8% acetic acid for 2 hours and digitized with a MicroTek ScanMaker 5700 using grayscale settings within ScanWizard (MicroTek).



## **SUPPLEMENTAL FIGURE LEGENDS**

**Supplemental Figure 1.** Non-denaturing PAGE analysis of TCR-multimers. TCR-multimers were resolved by NativePAGE and visualized using Coomassie Blue staining. Lanes are as follows: (1) molecular weight markers, (2) 1  $\mu\text{g}$ , (3) 2  $\mu\text{g}$ , or (4) 4  $\mu\text{g}$  streptavidin-APC fluorochrome, (5) 1  $\mu\text{g}$  monomeric TCR, (6) 1  $\mu\text{g}$ , (7) 2  $\mu\text{g}$ , or (8) 4  $\mu\text{g}$  conjugated TCR-multimers buffered with 0.2% BSA.
